# Supplementary material for: Circadian rhythm-related factors of PER and CRY family genes function as novel therapeutic targets and prognostic biomarkers in lung adenocarcinoma
Source: publisher site journal article supplement (doi:10.18632/aging.204386), 2022-11-16
Supplement: Supplementary file [file aging-v14i22-204386-supplementary-material-SD2.pdf]

## SUPPLEMENTARY TABLE

**Supplementary Table 1. Significant changes in transcriptional levels of circadian rhythm-related *PER* (period) and *CRY* (cryptochrome) family members in lung adenocarcinoma (LUAD) patients (using the Oncomine database).**

|             | LUAD vs. normal     | Fold change | <i>t</i> - test | <i>P</i> -value | Ref |
|-------------|---------------------|-------------|-----------------|-----------------|-----|
| <b>PER1</b> | Lung Adenocarcinoma | -5.555      | -5.002          | 3.35E-5         | [1] |
|             | Lung Adenocarcinoma | -1.717      | -6.597          | 1.38E-7         | [2] |
|             | Lung Adenocarcinoma | -2.125      | -10.850         | 8.29E-19        | [3] |
|             | Lung Adenocarcinoma | -1.861      | -5.451          | 6.23E-7         | [4] |
|             | Lung Adenocarcinoma | -2.148      | -7.754          | 1.77E-8         | [5] |
| <b>PER2</b> | Lung Adenocarcinoma | -1.803      | -5.958          | 1.29E-7         | [4] |
| <b>PER3</b> | Lung Adenocarcinoma | -2.024      | -6.727          | 1.05E-9         | [6] |
| <b>CRY1</b> | Lung Adenocarcinoma | -2.058      | -5.304          | 1.39E-6         | [4] |
|             | Lung Adenocarcinoma | -1.702      | -8.168          | 5.10E-13        | [6] |
| <b>CRY2</b> | Lung Adenocarcinoma | -1.836      | -8.556          | 9.60E-13        | [6] |
|             | Lung Adenocarcinoma | -3.450      | -4.537          | 2.47E-5         | [4] |

## REFERENCES

1. Bhattacharjee A, Richards WG, Staunton J, Li C, Monti S, Vasa P, Ladd C, Beheshti J, Bueno R, Gillette M, Loda M, Weber G, Mark EJ, et al. Classification of human lung carcinomas by mRNA expression profiling reveals distinct adenocarcinoma subclasses. *Proc Natl Acad Sci U S A*. 2001; 98:13790–5. <https://doi.org/10.1073/pnas.191502998> PMID:11707567
2. Stearman RS, Dwyer-Nield L, Zerbe L, Blaine SA, Chan Z, Bunn PA Jr, Johnson GL, Hirsch FR, Merrick DT, Franklin WA, Baron AE, Keith RL, Nemenoff RA, et al. Analysis of orthologous gene expression between human pulmonary adenocarcinoma and a carcinogen-induced murine model. *Am J Pathol*. 2005; 167:1763–75. [https://doi.org/10.1016/S0002-9440\(10\)61257-6](https://doi.org/10.1016/S0002-9440(10)61257-6) PMID:16314486
3. Landi MT, Dracheva T, Rotunno M, Figueroa JD, Liu H, Dasgupta A, Mann FE, Fukuoka J, Hames M, Bergen AW, Murphy SE, Yang P, Pesatori AC, et al. Gene expression signature of cigarette smoking and its role in lung adenocarcinoma development and survival. *PLoS One*. 2008; 3:e1651. <https://doi.org/10.1371/journal.pone.0001651> PMID:18297132
4. Su LJ, Chang CW, Wu YC, Chen KC, Lin CJ, Liang SC, Lin CH, Whang-Peng J, Hsu SL, Chen CH, Huang CY. Selection of DDX5 as a novel internal control for Q-RT-PCR from microarray data using a block bootstrap re-sampling scheme. *BMC Genomics*. 2007; 8:140. <https://doi.org/10.1186/1471-2164-8-140> PMID:17540040
5. Okayama H, Kohno T, Ishii Y, Shimada Y, Shiraishi K, Iwakawa R, Furuta K, Tsuta K, Shibata T, Yamamoto S, Watanabe S, Sakamoto H, Kumamoto K, et al. Identification of genes upregulated in ALK-positive and EGFR/KRAS/ALK-negative lung adenocarcinomas. *Cancer Res*. 2012; 72:100–11. <https://doi.org/10.1158/0008-5472.CAN-11-1403> PMID:22080568
6. Hou J, Aerts J, den Hamer B, van Ijcken W, den Bakker M, Riegman P, van der Leest C, van der Spek P, Foekens JA, Hoogsteden HC, Grosveld F, Philipsen S. Gene expression-based classification of non-small cell lung carcinomas and survival prediction. *PLoS One*. 2010; 5:e10312. <https://doi.org/10.1371/journal.pone.0010312> PMID:20421987
